# Supplementary material for: Induction of high titred, non-neutralising antibodies by self-adjuvanting peptide epitopes derived from the respiratory syncytial virus fusion protein
Source: PubMed Central journal article supplement (PMC5593926; doi:10.1038/s41598-017-10415-w), 2017-09-11
Supplement: 41598_2017_10415_MOESM1_ESM.pdf [file 41598_2017_10415_MOESM1_ESM.pdf]

## Supplementary Information

### Induction of high titred, non-neutralising antibodies by self-adjuvanting peptide epitopes derived from the respiratory syncytial virus fusion protein

**Authors:** Noushin Jaberolansar<sup>1</sup>, Keith Chappell<sup>1,2</sup>, Daniel Watterson<sup>1,2</sup>, Imogen M Bermingham<sup>1</sup>, Istvan Toth<sup>1,2,3</sup>, Paul R Young<sup>1,2</sup>, Mariusz Skwarczynski\*<sup>1</sup>

#### Affiliations:

<sup>1</sup>  
School of Chemistry and Molecular Biosciences, The University of Queensland, St Lucia, Queensland, Australia

<sup>2</sup>  
Australian Infectious Diseases Research Centre, The University of Queensland, St Lucia, Queensland, Australia

<sup>3</sup>  
School of Pharmacy, The University of Queensland, Woolloongabba, Queensland, Australia

\*To whom correspondence should be addressed:

K.J.C (k.chappell@uq.edu.au), D.W. (d.watterson@uq.edu.au) and M. S. (m.skwarczynski@uq.edu.au)

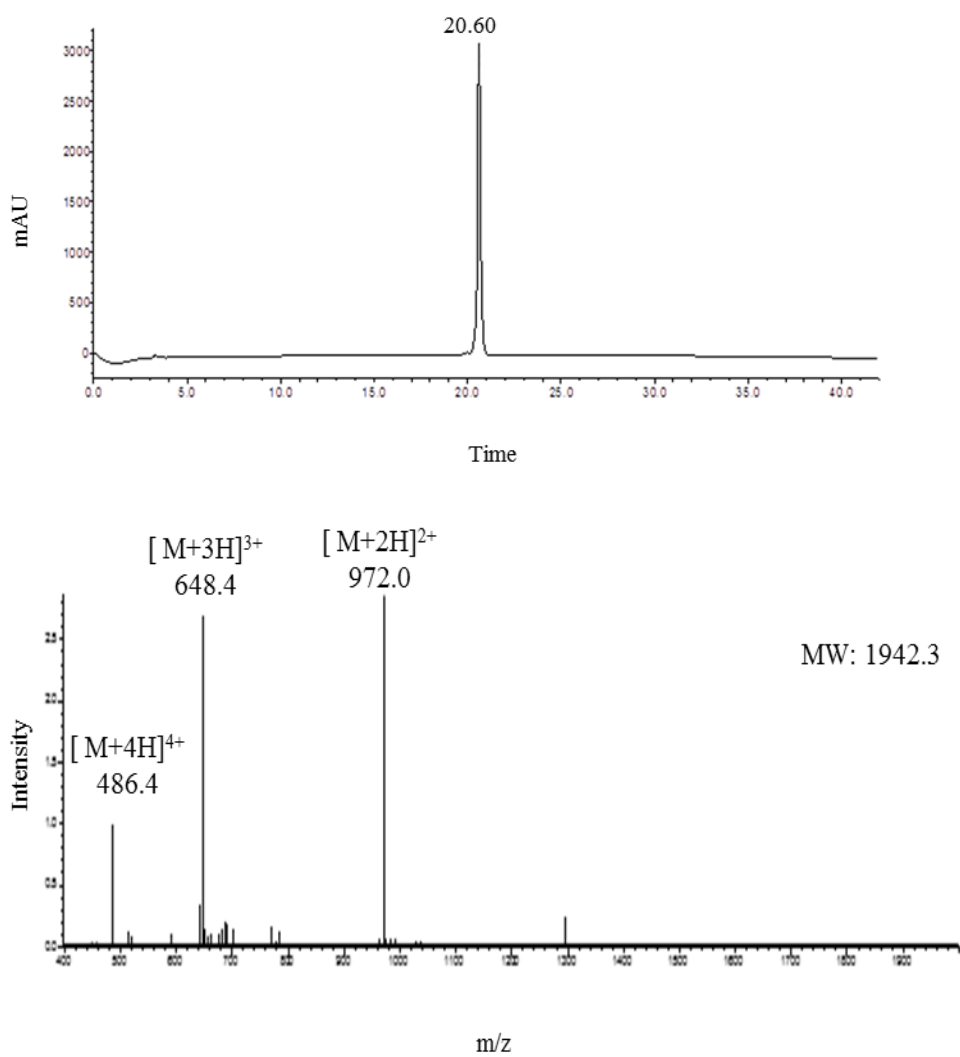

**Figure S1** Peptide **ØP1**. Yield: 27%. Molecular Weight: 1942.3. ESI-MS [M+2H]<sup>2+</sup> m/z 972.0 (calc. 972.1), [M+3H]<sup>3+</sup> m/z 648.4 (calc. 648.4), [M+4H]<sup>4+</sup> m/z 486.4 (calc. 486.5). t<sub>R</sub>= 20.60 min (0-100% solvent B; C18 column), purity ≥95.

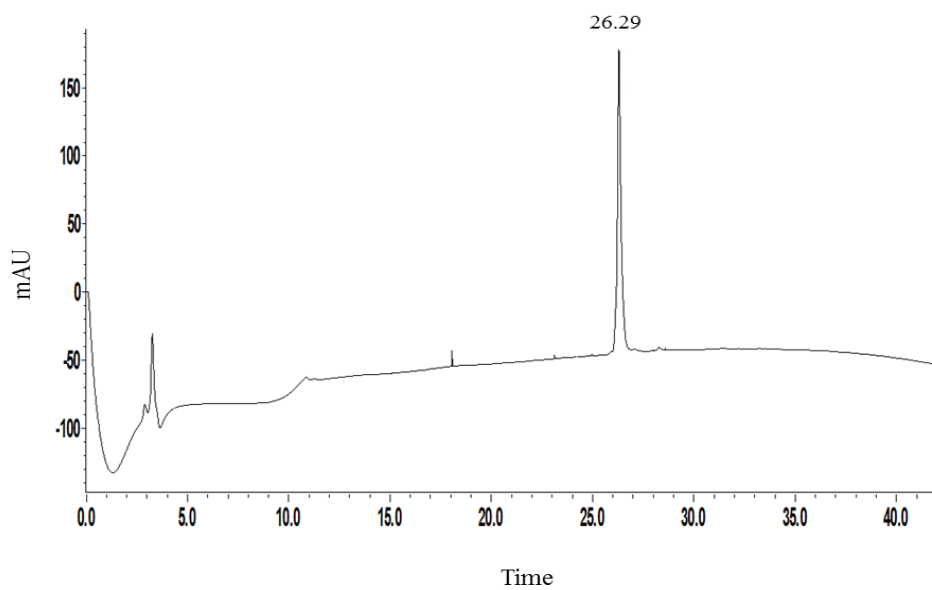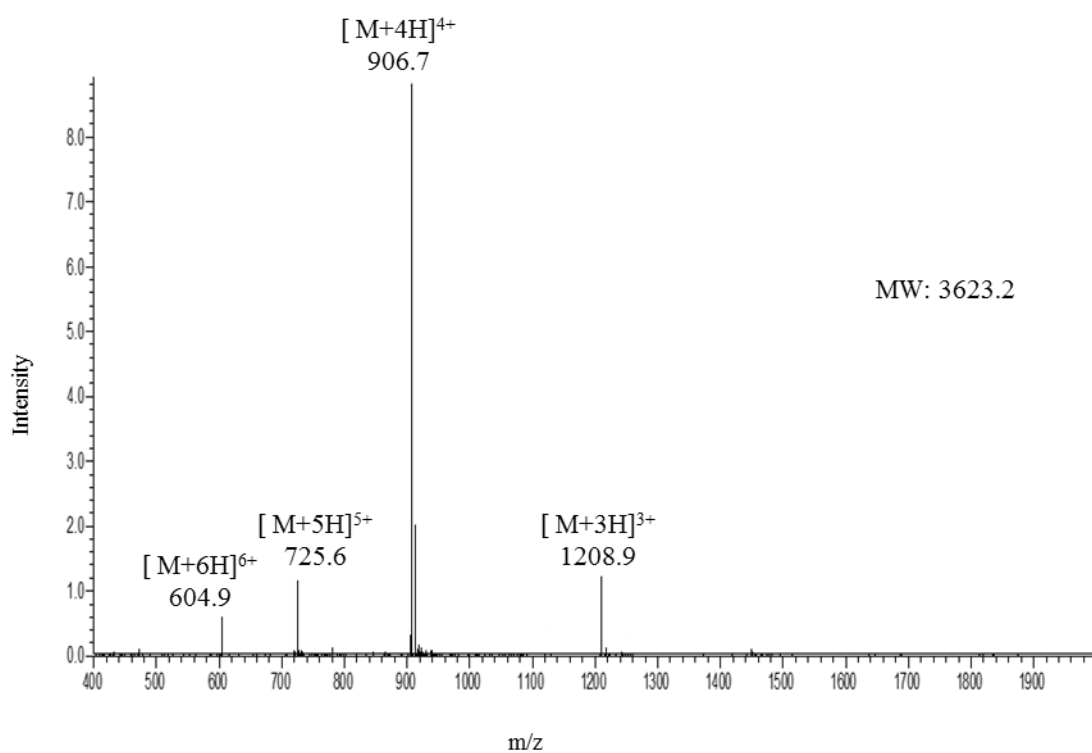

**Figure S2** Peptide **ØP2**. Yield: 21%. Molecular Weight: 3623.2. ESI-MS  $[M+3H]^{3+}$  m/z 1208.9 (calc. 1208.7),  $[M+4H]^{4+}$  m/z 906.7 (calc. 906.8),  $[M+5H]^{5+}$  m/z 725.6 (calc. 725.6),  $[M+6H]^{6+}$  m/z 604.9 (calc. 604.8).  $t_R$  = 26.29 min (0-100% solvent B; C18 column), purity  $\geq 95$ .

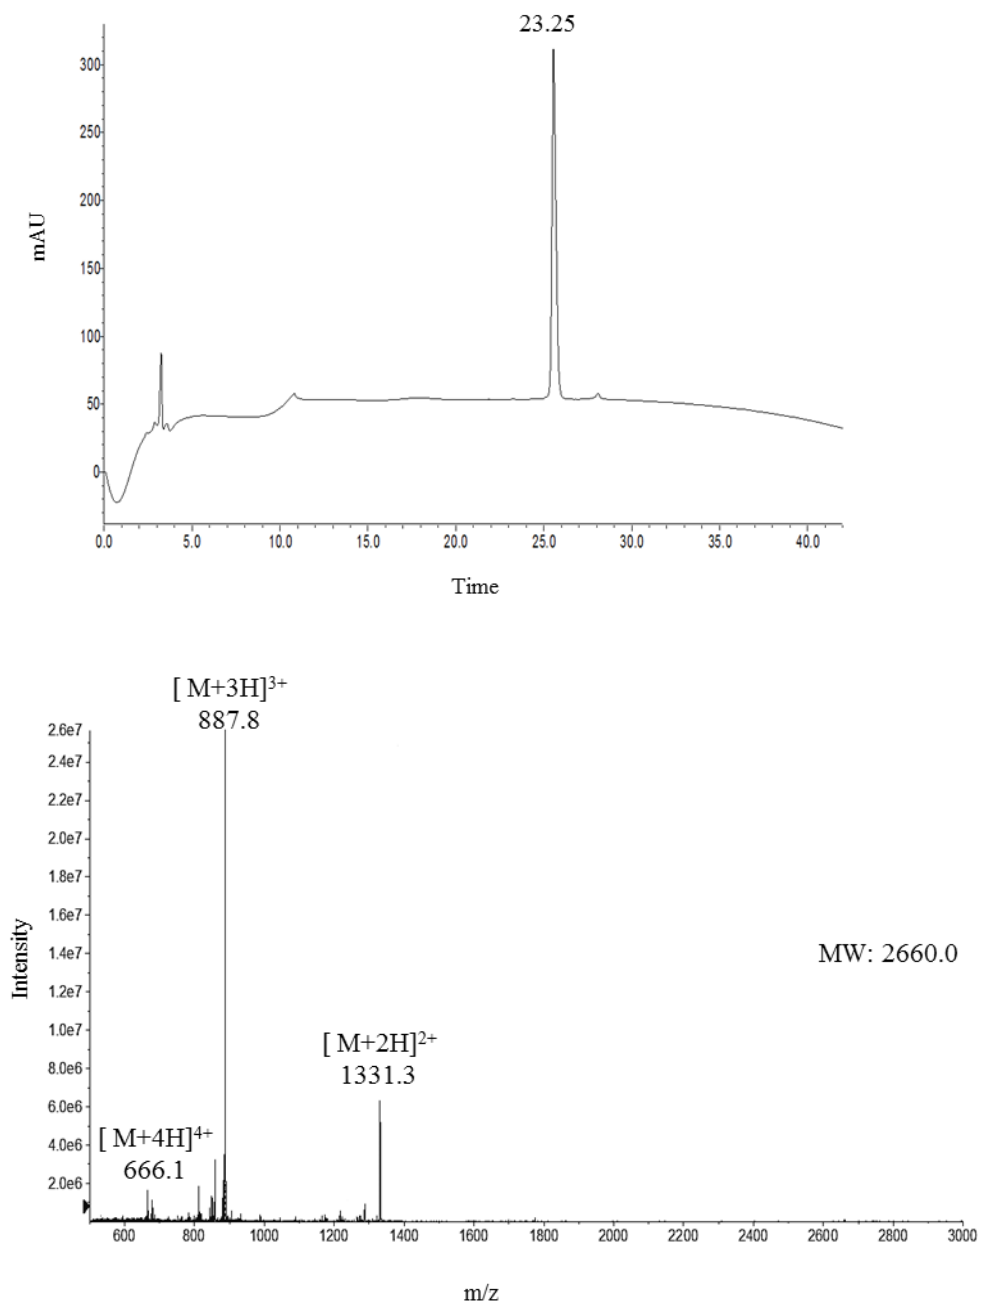

**Figure S3** Peptide **IIP3**. Yield: 12%. Molecular Weight: 2660.0. ESI-MS [M+2H]<sup>2+</sup> m/z 1331.3 (calc. 1331.0), [M+3H]<sup>3+</sup> m/z 887.8 (calc. 887.6), [M+4H]<sup>4+</sup> m/z 666.1 (calc. 666.0).  $t_R$  = 23.25 min (0-100% solvent B; C18 column), purity  $\geq$ 95.

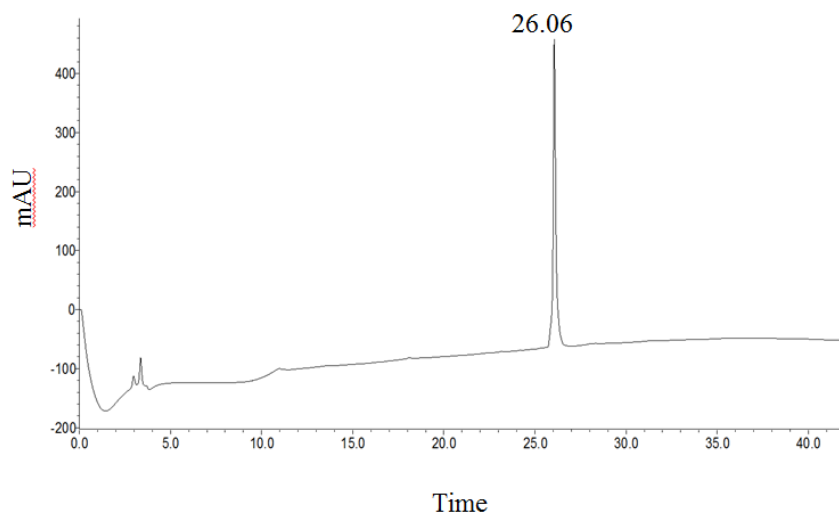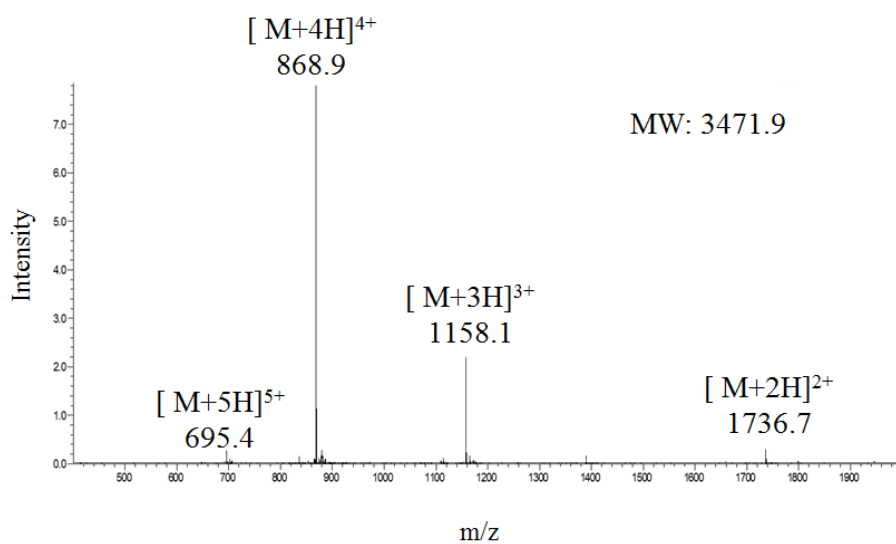

**Figure S4** Peptide **IP4**. Yield: 15%. Molecular Weight: 3471.9. ESI-MS  $[M+2H]^{2+}$  m/z 1736.7 (calc. 1736.9),  $[M+3H]^{3+}$  m/z 1158.1 (calc. 1158.3),  $[M+4H]^{4+}$  m/z 868.9 (calc. 868.9),  $[M+5H]^{5+}$  m/z 695.4 (calc. 695.3).  $t_R = 26.06$  min (0-100% solvent B; C18 column), purity  $\geq 95$ .

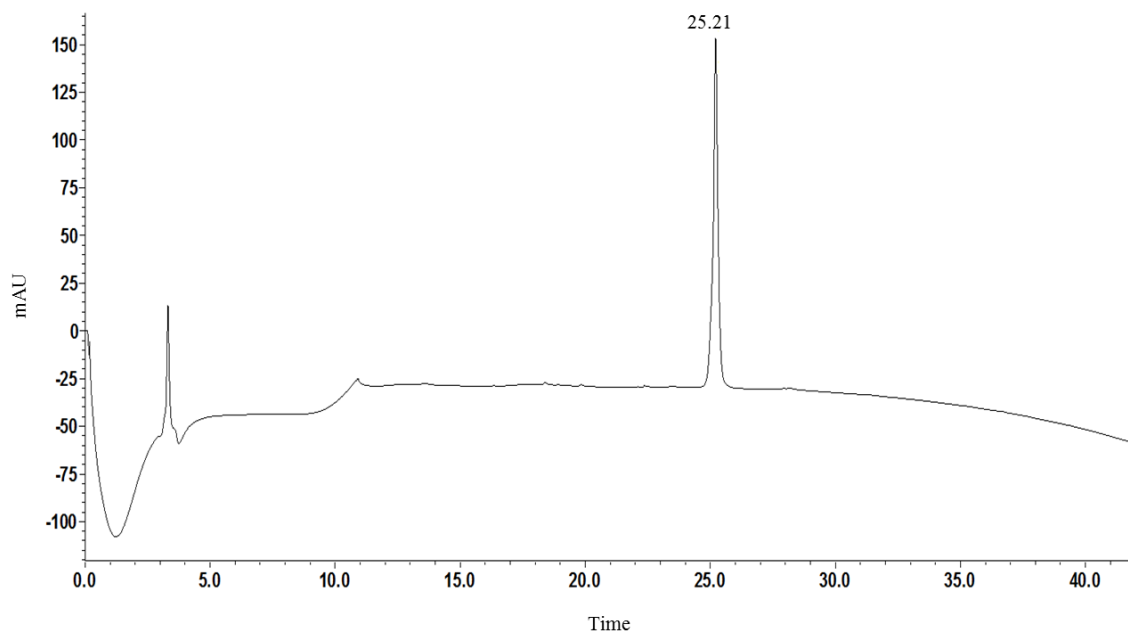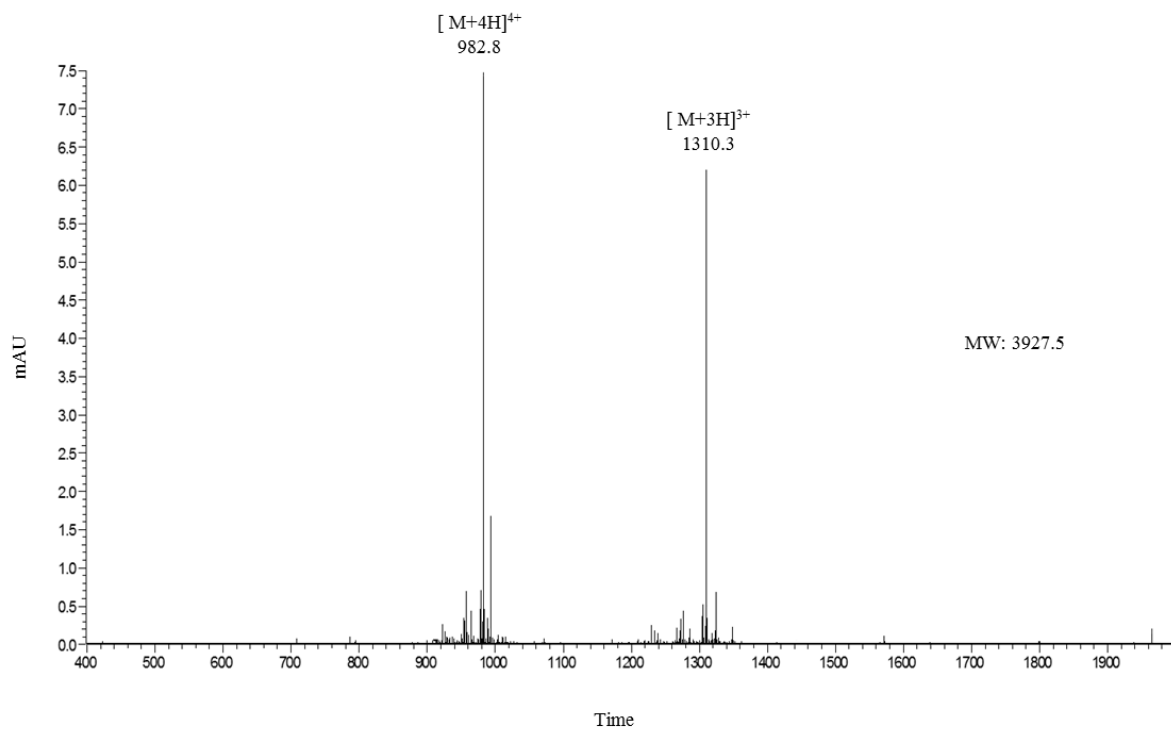

**Figure S5** Peptide **IIP5**. Yield: 20%. Molecular Weight: 3927.5. ESI-MS  $[M+3H]^{3+}$  m/z 1310.3 (calc. 1310.1),  $[M+4H]^{4+}$  m/z 982.8 (calc. 982.8).  $t_R$  = 25.21 min (0-100% solvent B; C18 column), purity  $\geq 95$ .

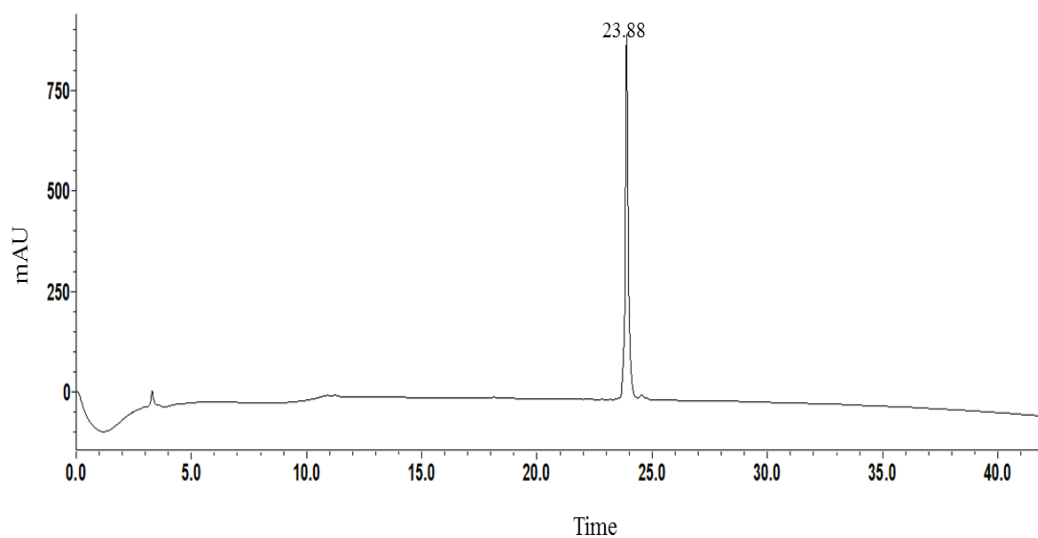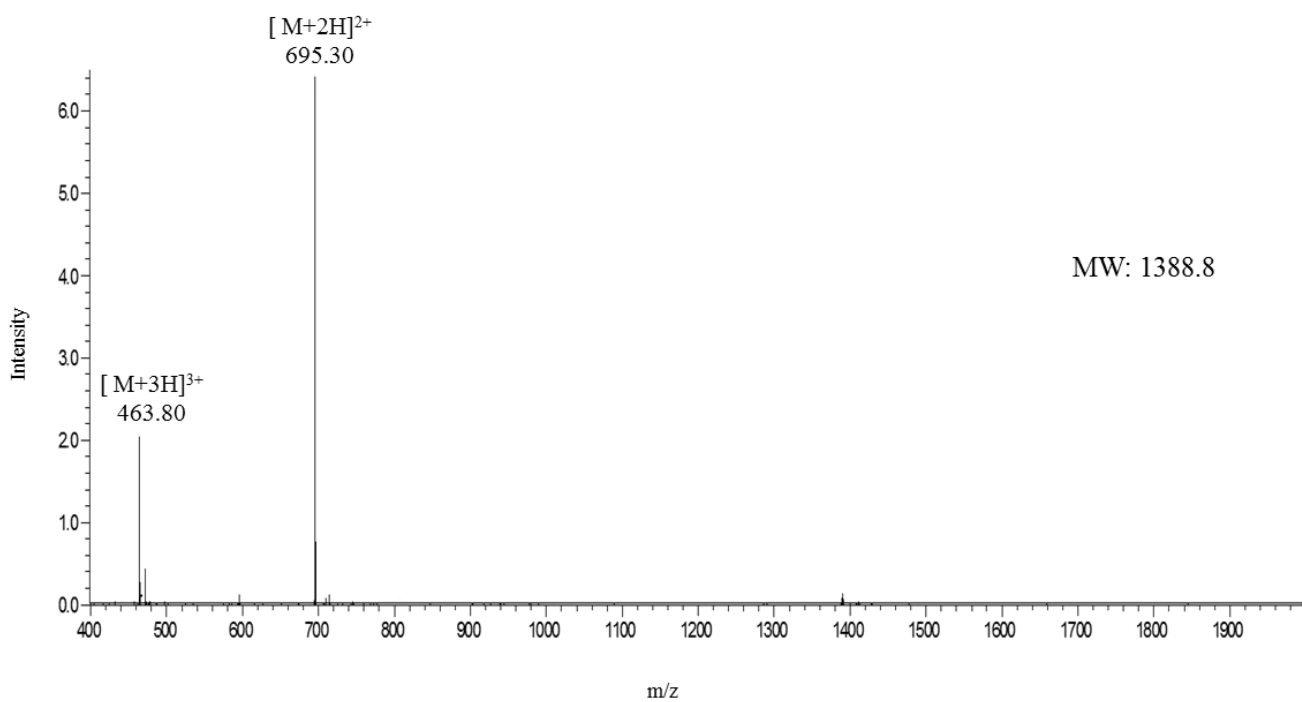

**Figure S6 PADRE.** Yield: 52%. Molecular Weight: 1388.8. ESI-MS  $[M+2H]^{2+}$  m/z 695.3 (calc. 695.4),  $[M+3H]^{3+}$  m/z 463.8 (calc. 463.9).  $t_R = 23.88$  (0-100% solvent B; C18 column), purity  $\geq 95$ .

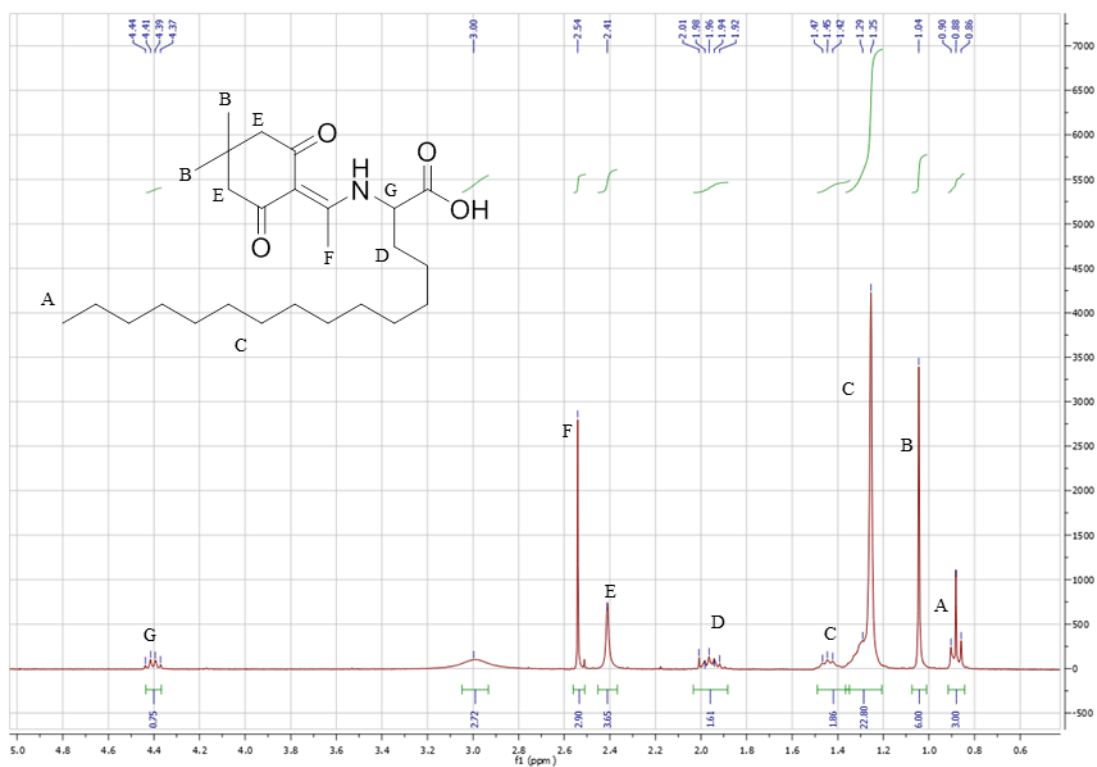

**Figure S7 Dde-C16** <sup>1</sup>H NMR (500 MHz, CDCl<sub>3</sub>): 0.86 (t,  $J=6.9$  Hz, 3H, CH<sub>3</sub>), 1.04 (s, 6H, CH<sub>3</sub>), 1.25-1.29 (m, 22H, CH<sub>2</sub>), 1.42-1.47 (m, 2H, CH<sub>2</sub>), 1.92-2.01 (m, 2H, CH<sub>2</sub>), 2.41 (s, 4H, CH<sub>2</sub>), 2.54 (s, 3H, CH<sub>3</sub>), 3.00(q,  $J=6.6$  Hz, 2H, CH), 4.37-4.44 (s, 1H, NH).

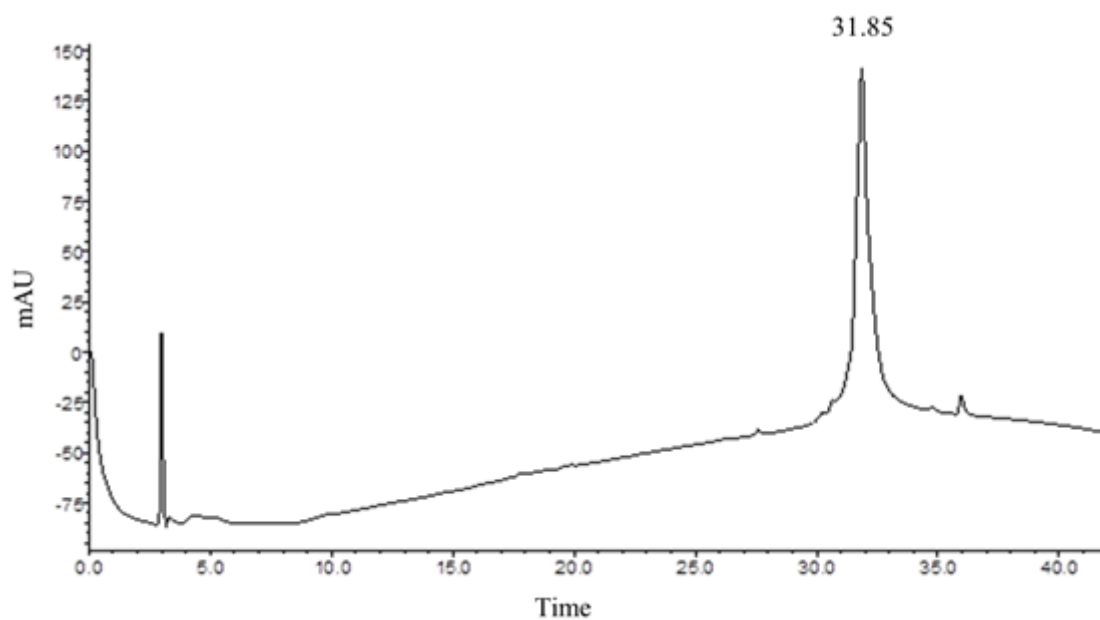



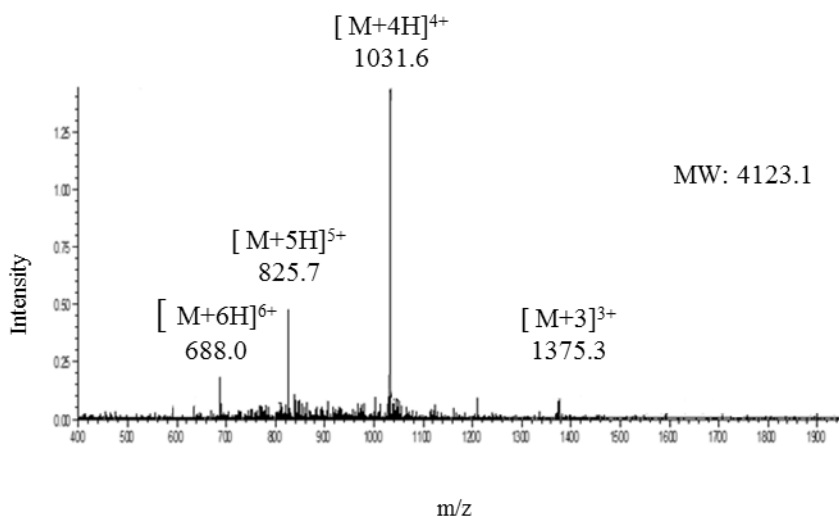

**Figure S8 ØLCP1.** Yield: 16%. Molecular Weight: 4123.1. ESI-MS  $[M+3H]^{3+}$  m/z 1375.3 (calc. 1375.3),  $[M+4H]^{4+}$  m/z 1031.6 (calc. 1031.7),  $[M+5H]^{5+}$  m/z 825.7 (calc. 825.6),  $[M+6H]^{6+}$  m/z 688.0 (calc. 688.1).  $t_R = 31.85$  min (0-100% solvent B; C4 column), purity  $\geq 95$ .

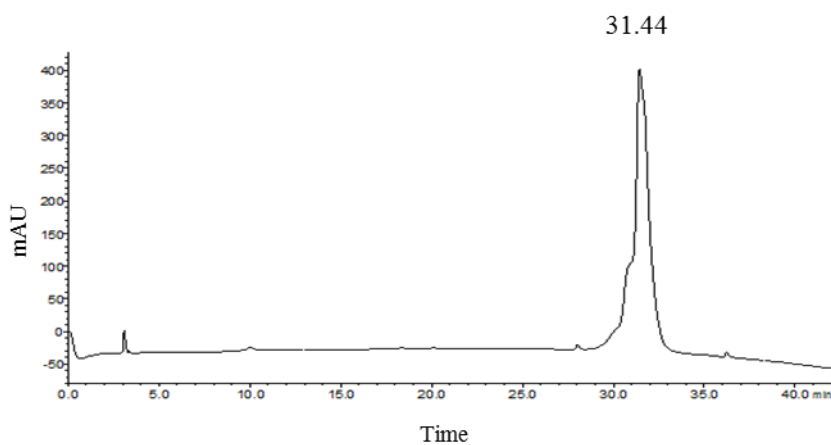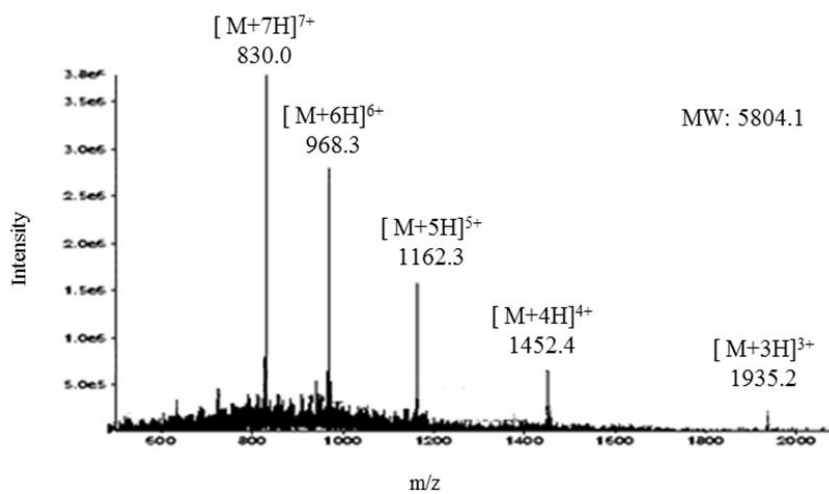

**Figure S9 ØLCP2.** Yield: 14%. Molecular Weight: 5804.1. ESI-MS  $[M+3H^+]^{3+}$   $m/z$  1935.2 (calc. 1935.7),  $[M+4H^+]^{4+}$   $m/z$  1452.4 (calc. 1425.0),  $[M+5H^+]^{5+}$   $m/z$  1162.3 (calc. 1161.8),  $[M+6H^+]^{6+}$   $m/z$  968.3 (calc. 968.3),  $[M+7H^+]^{7+}$   $m/z$  830.0 (calc. 830.1).  $t_R = 31.44$  min (0-100% solvent B; C4 column), purity  $\geq 95$ .

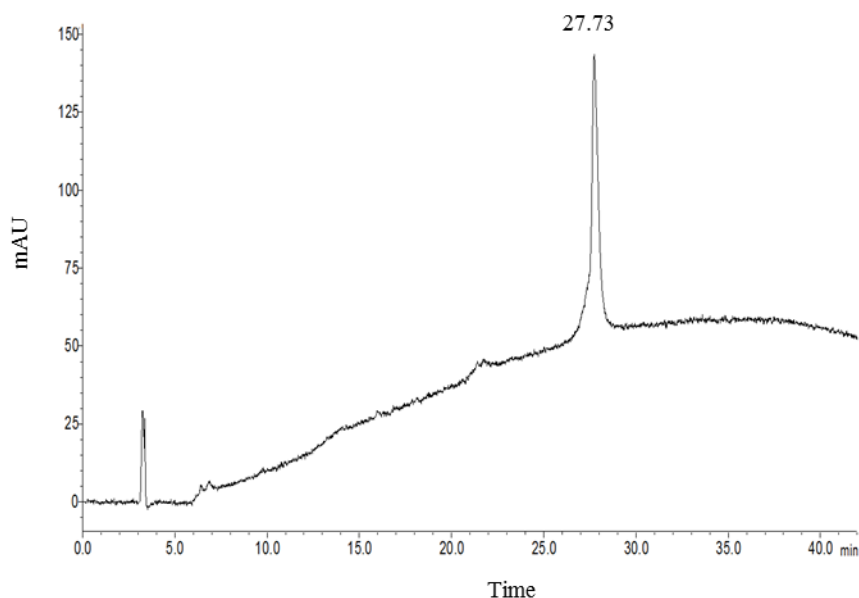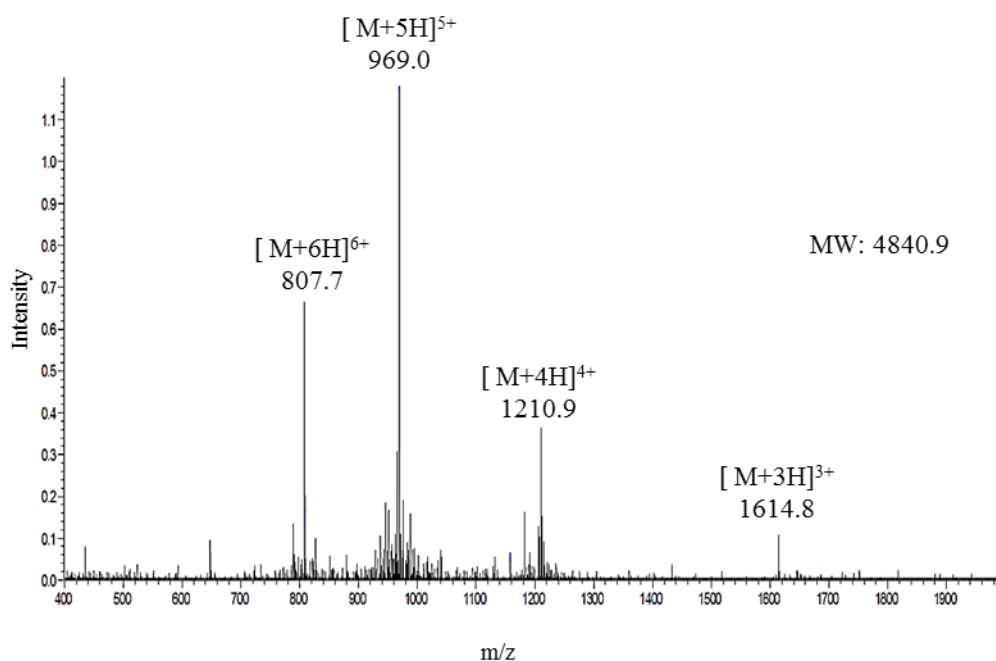

**Figure S10 IILCP3.** Yield: 12%. Molecular Weight: 4840.9. ESI-MS  $[M+3H^+]^{3+}$   $m/z$  1614.8 (calc. 1614.6),  $[M+4H^+]^{4+}$   $m/z$  1210.9 (calc. 1211.2),  $[M+5H^+]^{5+}$   $m/z$  969.0 (calc. 969.1),  $[M+6H^+]^{6+}$   $m/z$  807.7 (calc. 807.8),  $t_R = 27.73$  min (0-100% solvent B; C4 column), purity  $\geq 95$ .

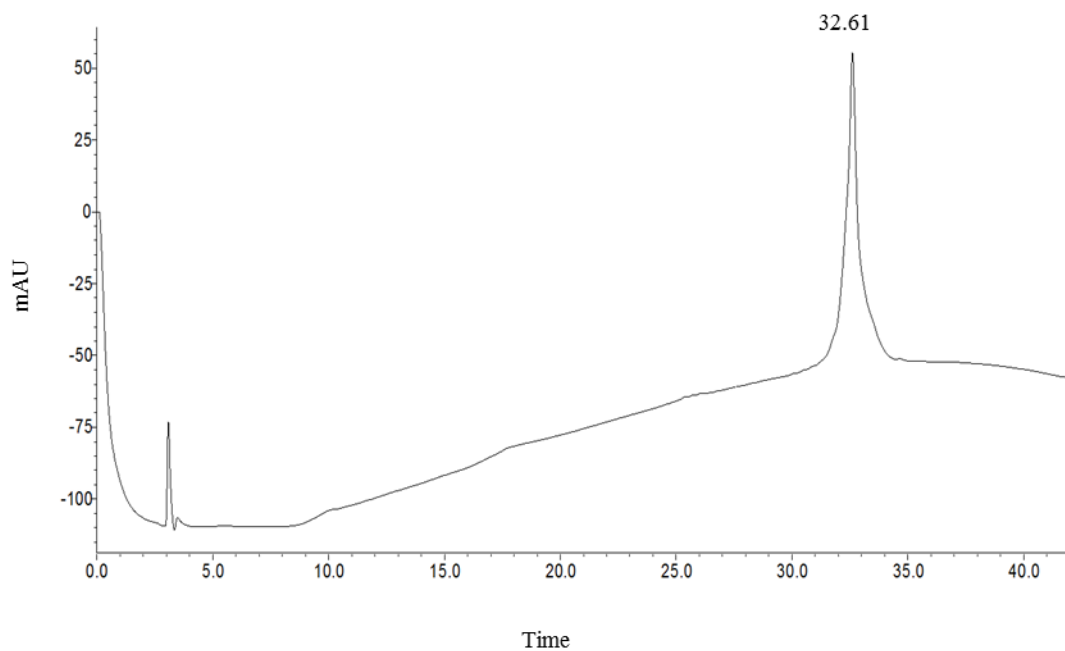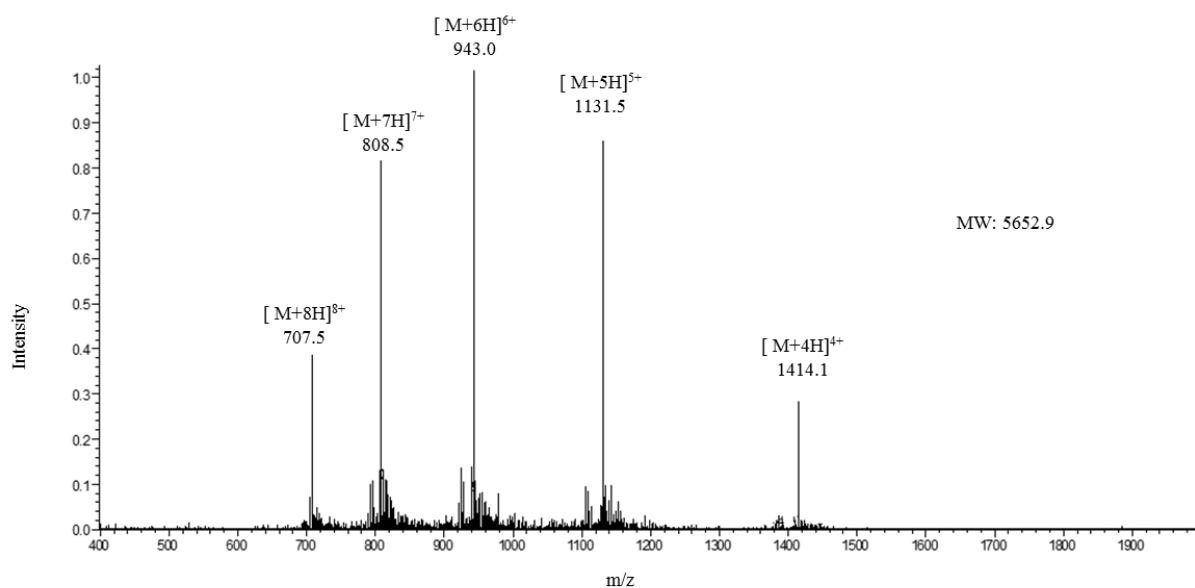

**Figure S11 IILCP4.** Yield: 16%. Molecular Weight: 5652.9. ESI-MS  $[M+4H]^{4+}$   $m/z$  1414.1 (calc. 1414.2),  $[M+5H]^{5+}$   $m/z$  1131.5 (calc. 1131.5),  $[M+6H]^{6+}$   $m/z$  943.0 (calc. 943.1),  $[M+7H]^{7+}$   $m/z$  808.5 (calc. 808.5),  $[M+8H]^{8+}$   $m/z$  707.5 (calc. 707.6).  $t_R = 32.61$  min (0-100% solvent B; C4 column), purity  $\geq 95$ .

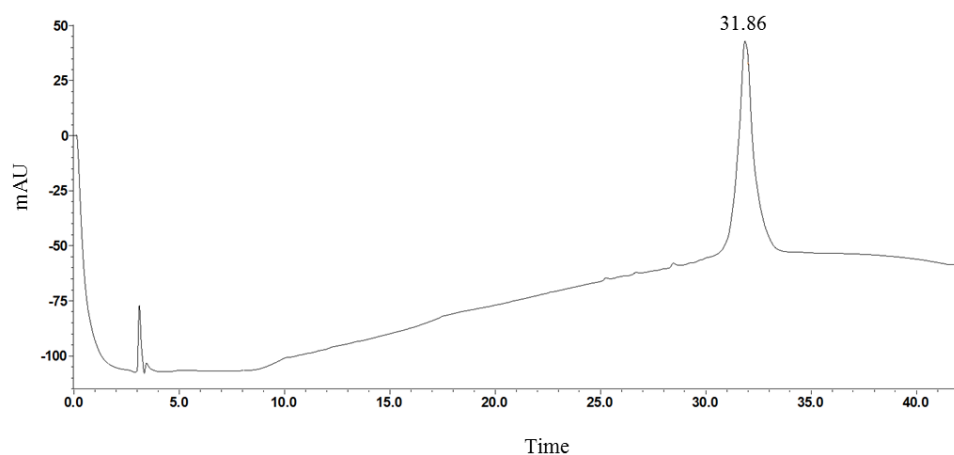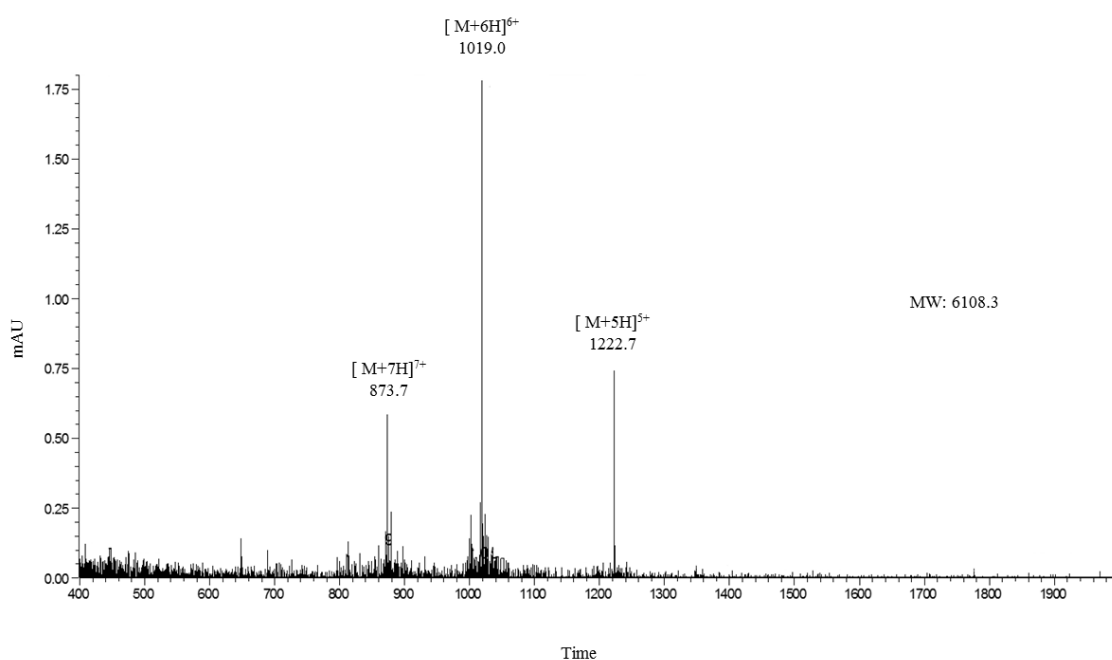

**Figure S12 IILCP5.** Yield: 23%. Molecular Weight: 6108.3. ESI-MS  $[M+5H]^+ m/z$  1222.7 (calc. 1222.6),  $[M+6H]^+ m/z$  1019.0 (calc. 1019.0),  $[M+7H]^+ m/z$  873.7 (calc. 873.6).  $t_R=$  31.86 min (0-100% solvent B; C4 column), purity  $\geq$ 95.

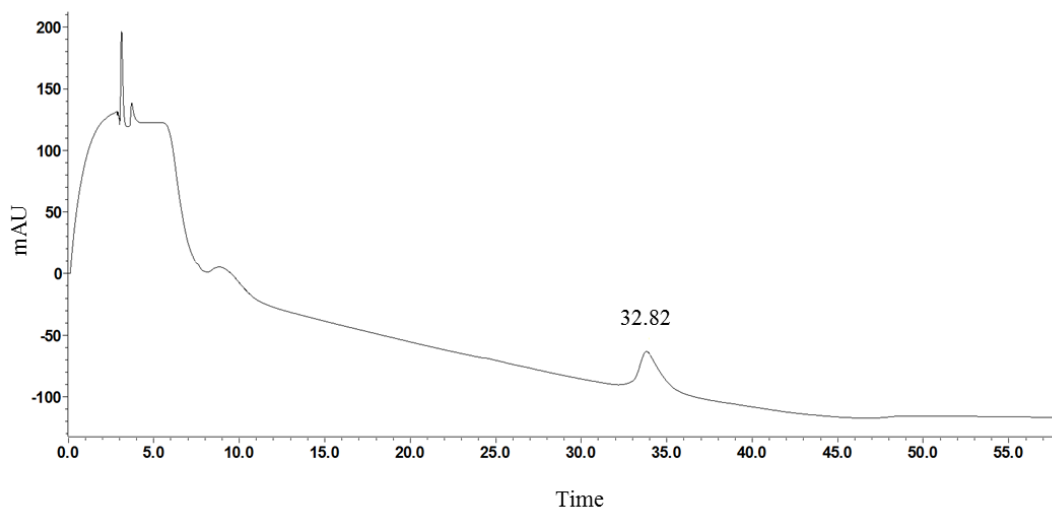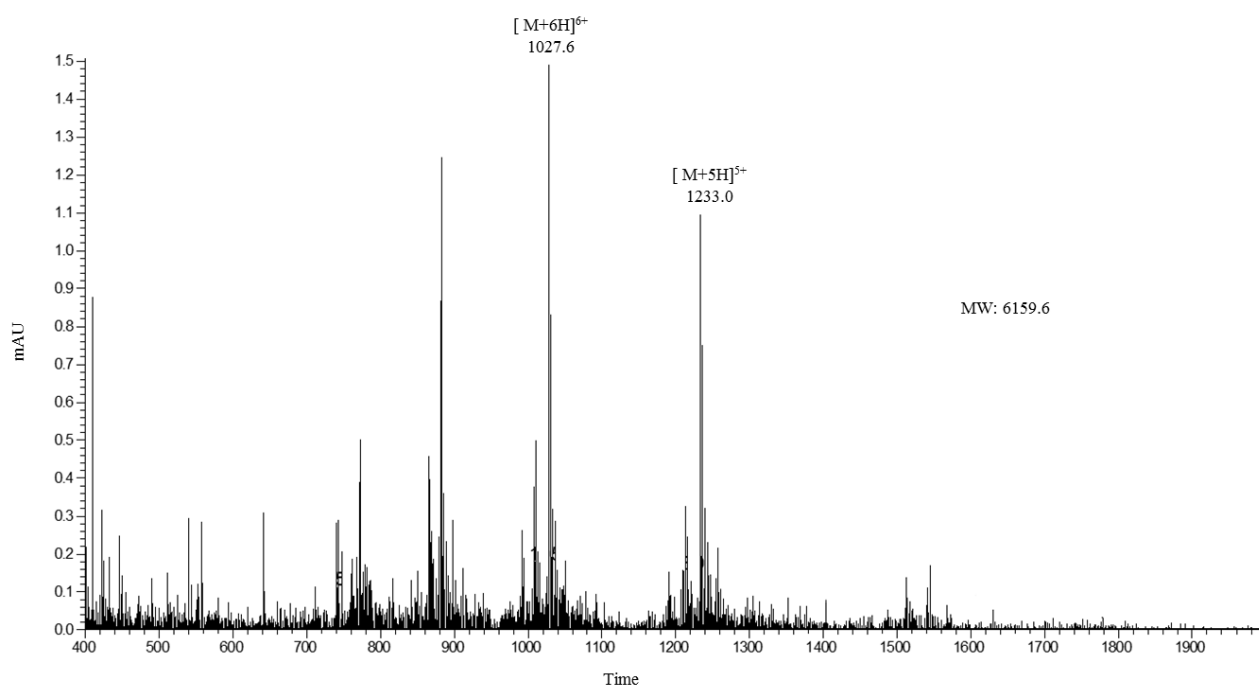

**Figure S13 IILCP6.** Yield: 13%. Molecular Weight: 6159.6. ESI-MS  $[M+5H]^+$   $m/z$  1233.0 (calc. 1232.9),  $[M+6H]^+$   $m/z$  1027.6 (calc. 1207.6).  $t_R$  = 32.82 min (50-100% solvent C; C4 column), purity  $\geq 95$ .

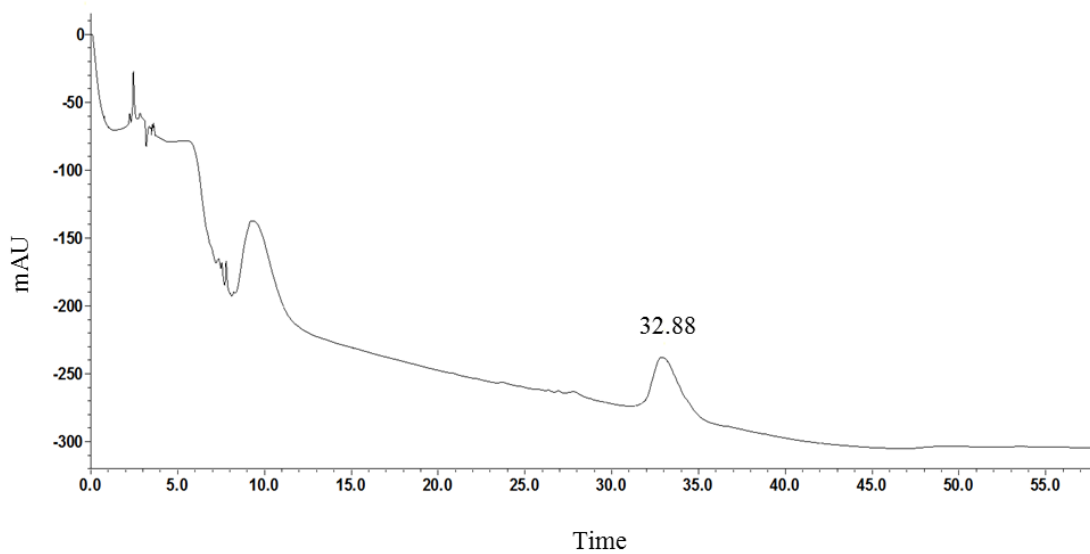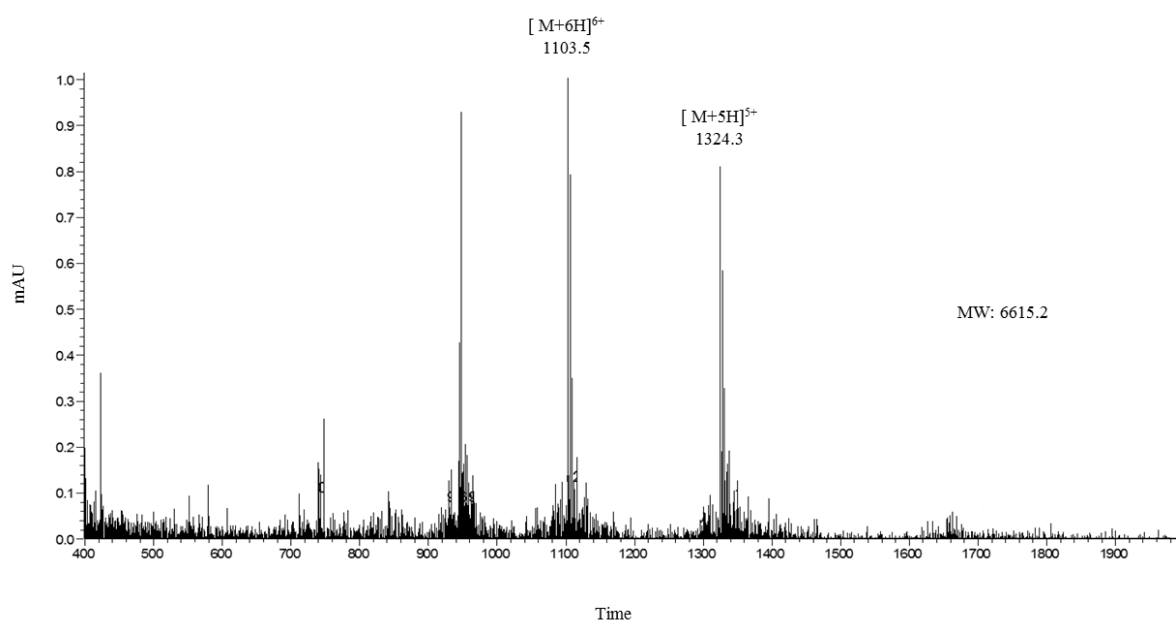

**Figure S14 IILCP7.** Yield: 10%. Molecular Weight: 6615.2. ESI-MS [M+5H]<sup>5+</sup> m/z 1324.3 (calc. 1324.0), [M+6H]<sup>6+</sup> m/z 1103.5 (calc. 1103.5).  $t_R$  = 32.88 min (50-100% solvent C; C4 column), purity  $\geq$ 95.

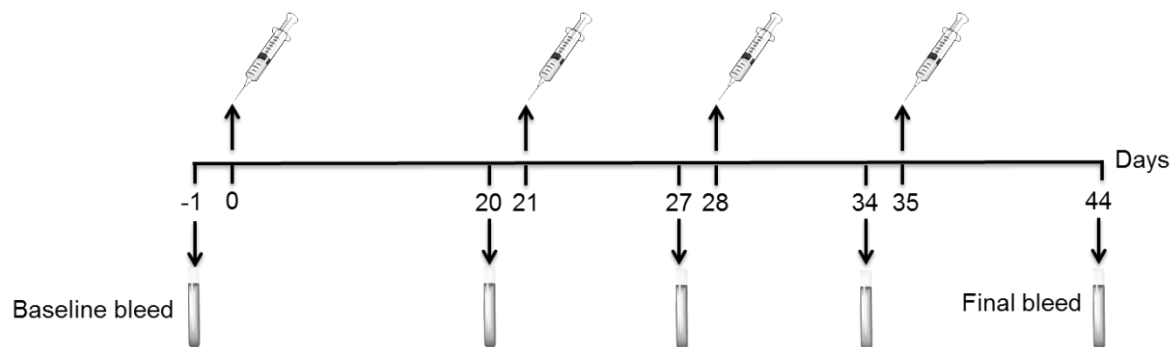

**Figure S15** Experimental timeline for in vivo experiment. Female C57BL/6 mice were immunised by the S.C route starting at day 0. Blood samples were collected on days -1, 20, 27, 34 and 44.

**A**

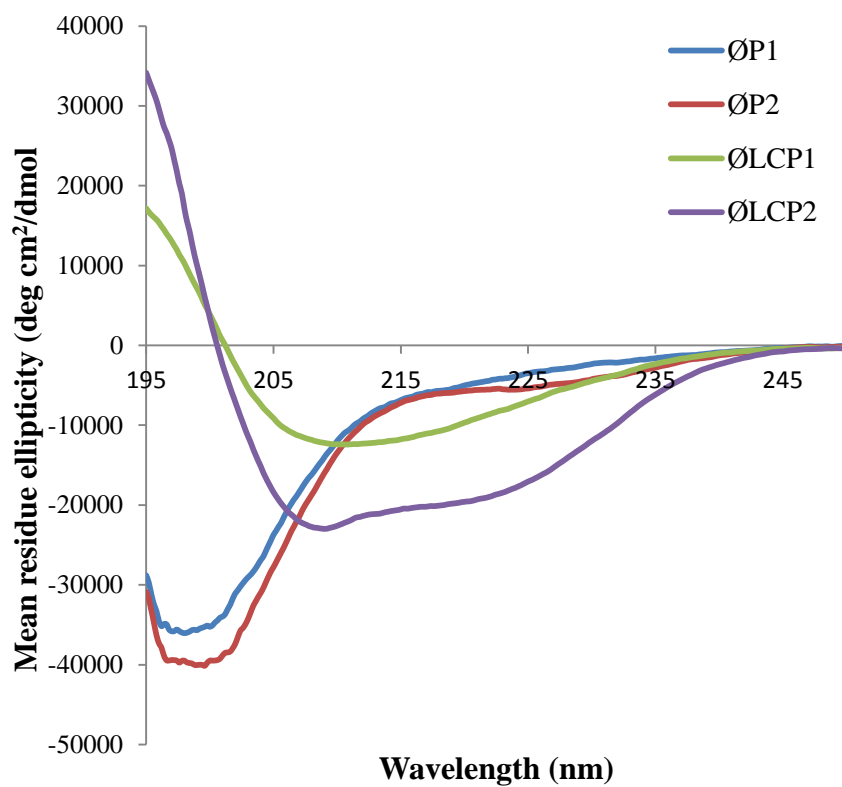

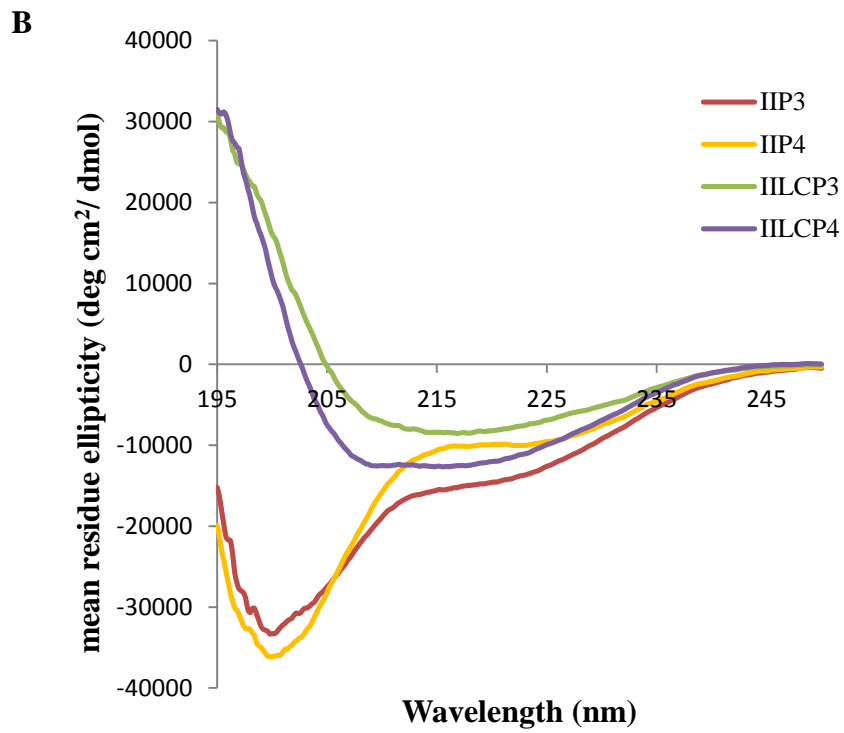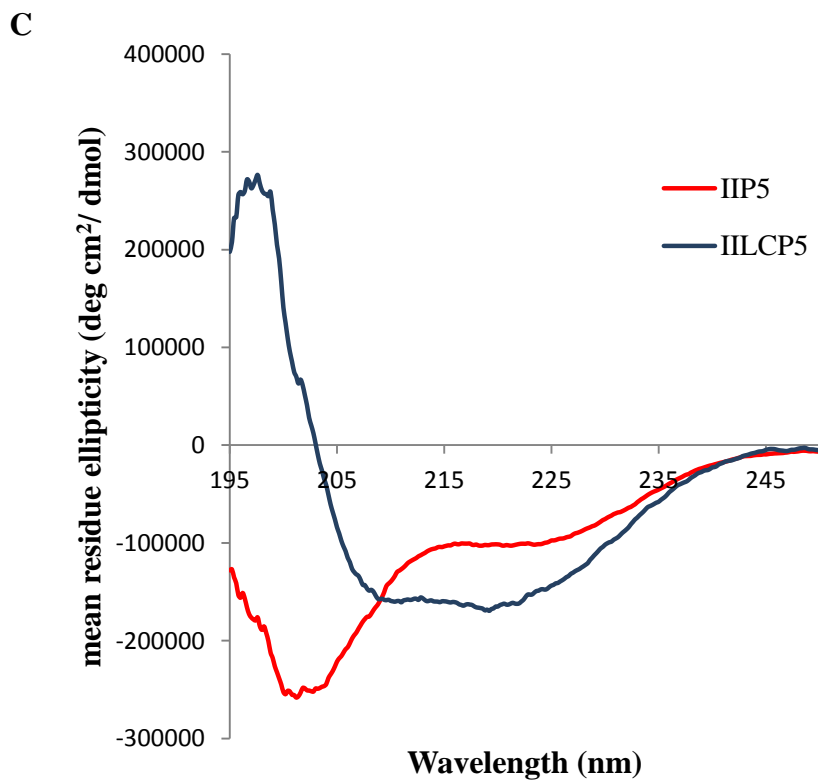

**Figure S16** Circular dichroism (CD) spectra of peptides and vaccine candidates in water. CD results of constructs containing **A**) antigenic site Ø, **B**) and **C**) antigenic site II.



Infected

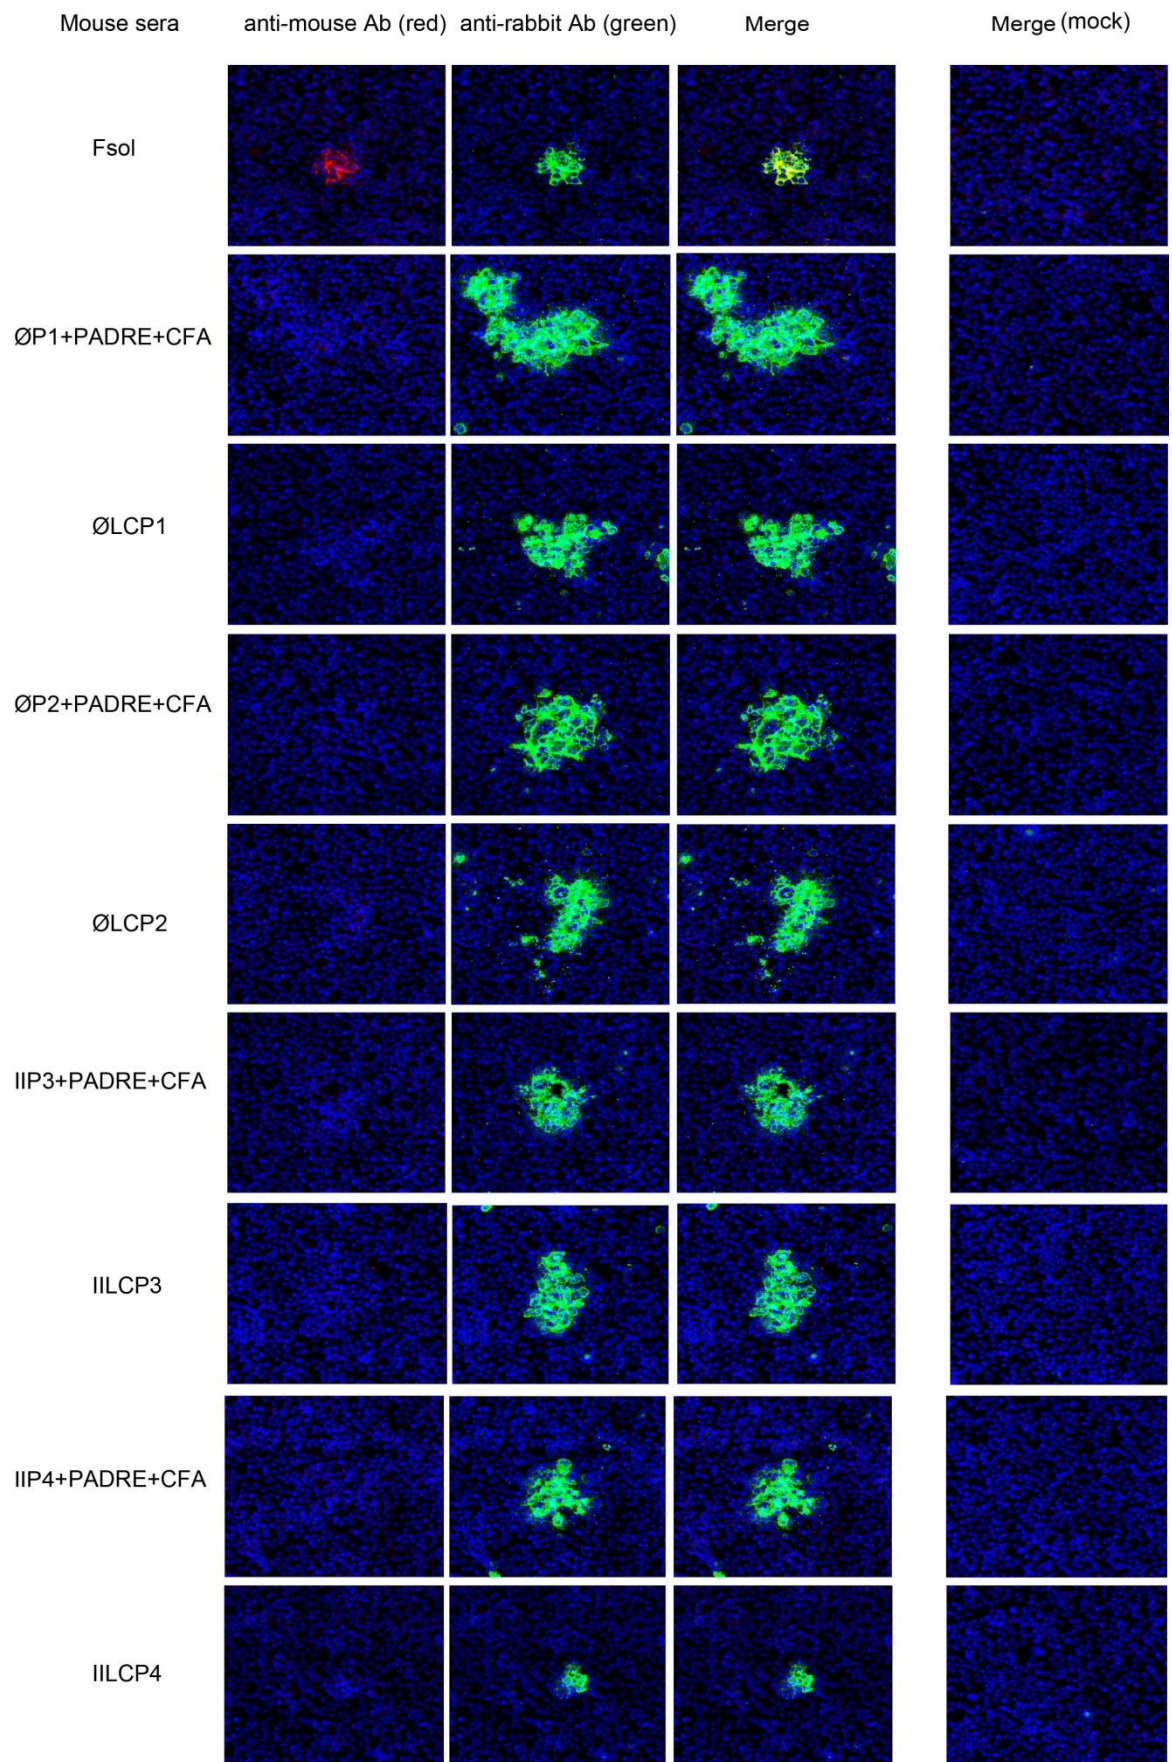

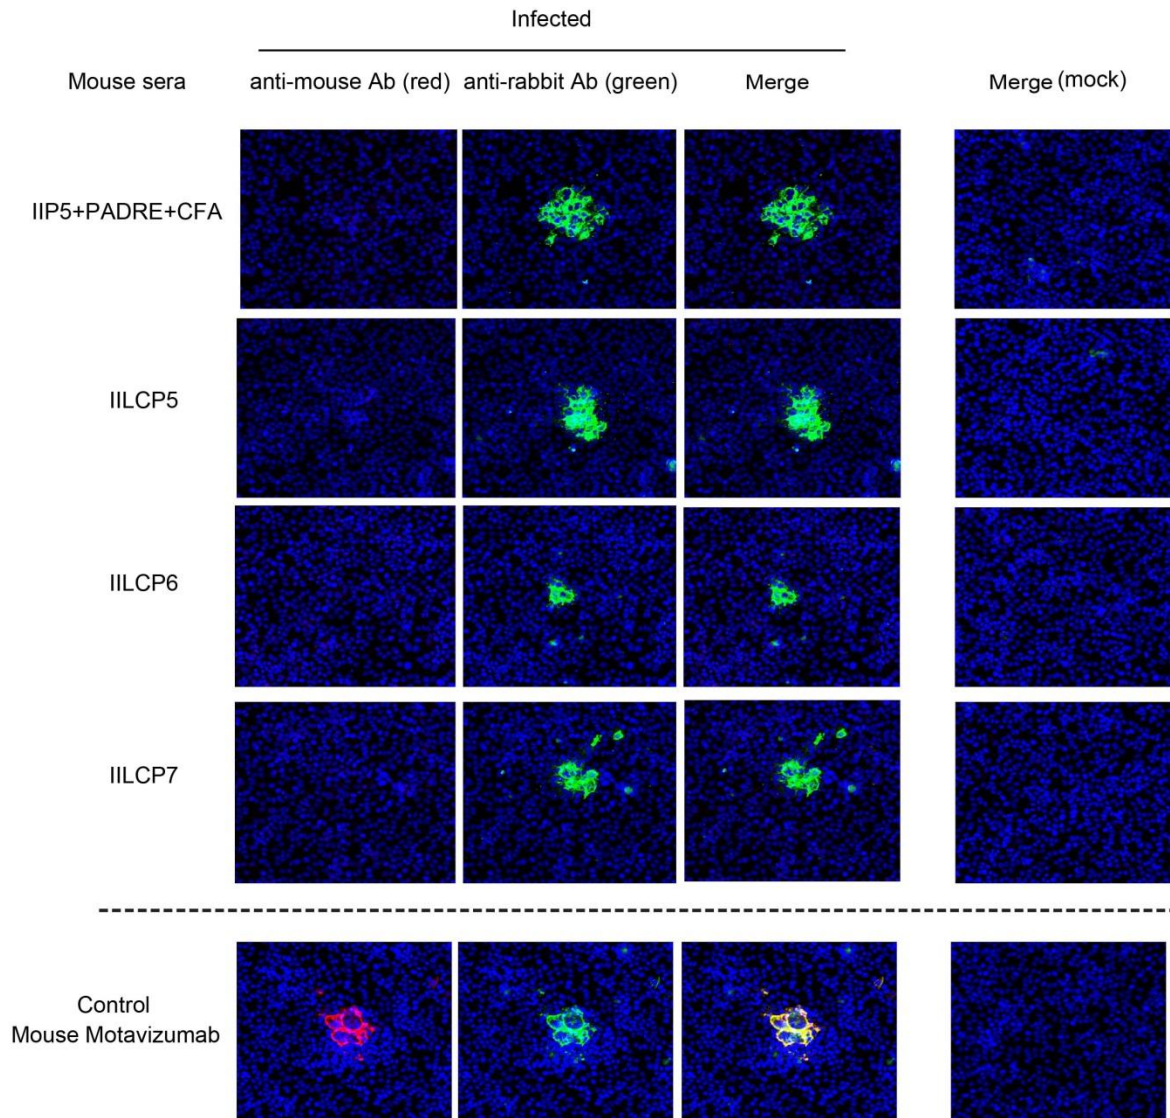

**Figure S17** Binding of sera to RSV infected cells assessed using immunofluorescence. Infected and mock infected were used to assess the ability of sera from immunised mice to recognise native RSV F. To aid visualisation of the cell monolayer nuclei were stained with HOECHST dye (blue). RSV infection was confirmed with the use of a rabbit anti-RSV F polyclonal (green). The ability of vaccinated mice sera to bind to infected cell was visualised with fluorophore 555-conjugated anti-mouse antibody (red). All sera was used at a 1:20 dilution. Mouse Motavizumab was used as a positive control for reactivity (bottom panels). Analysis was performed on Zeiss LSM 710 inverted confocal microscope. Only sera from mice immunised with F<sub>sol</sub> could detect RSV infection.



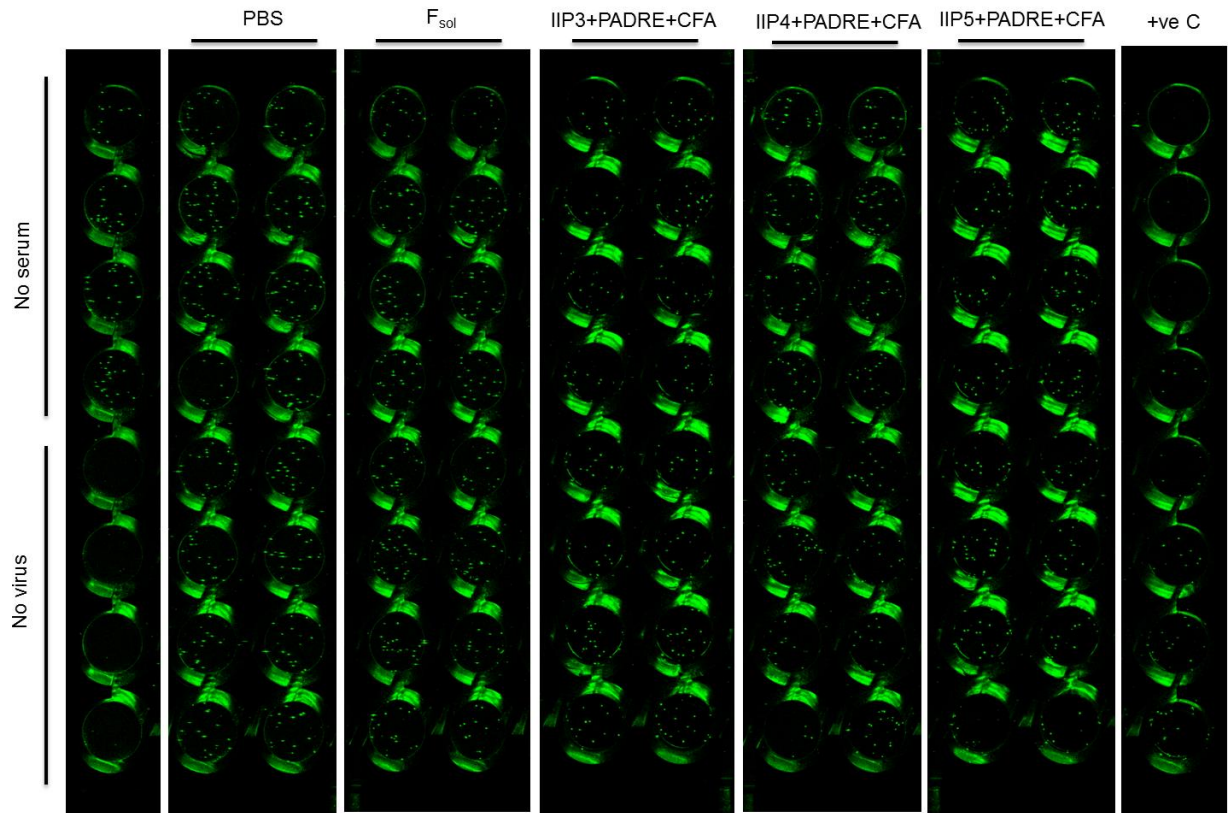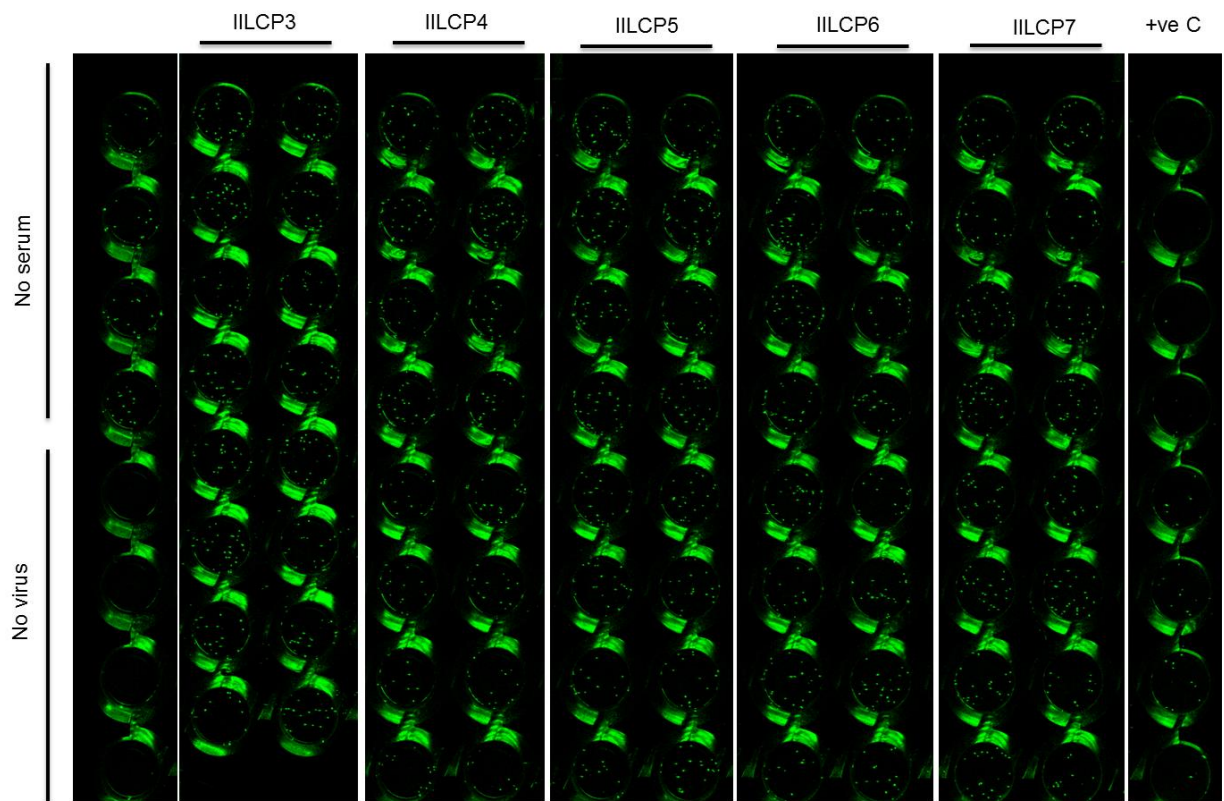

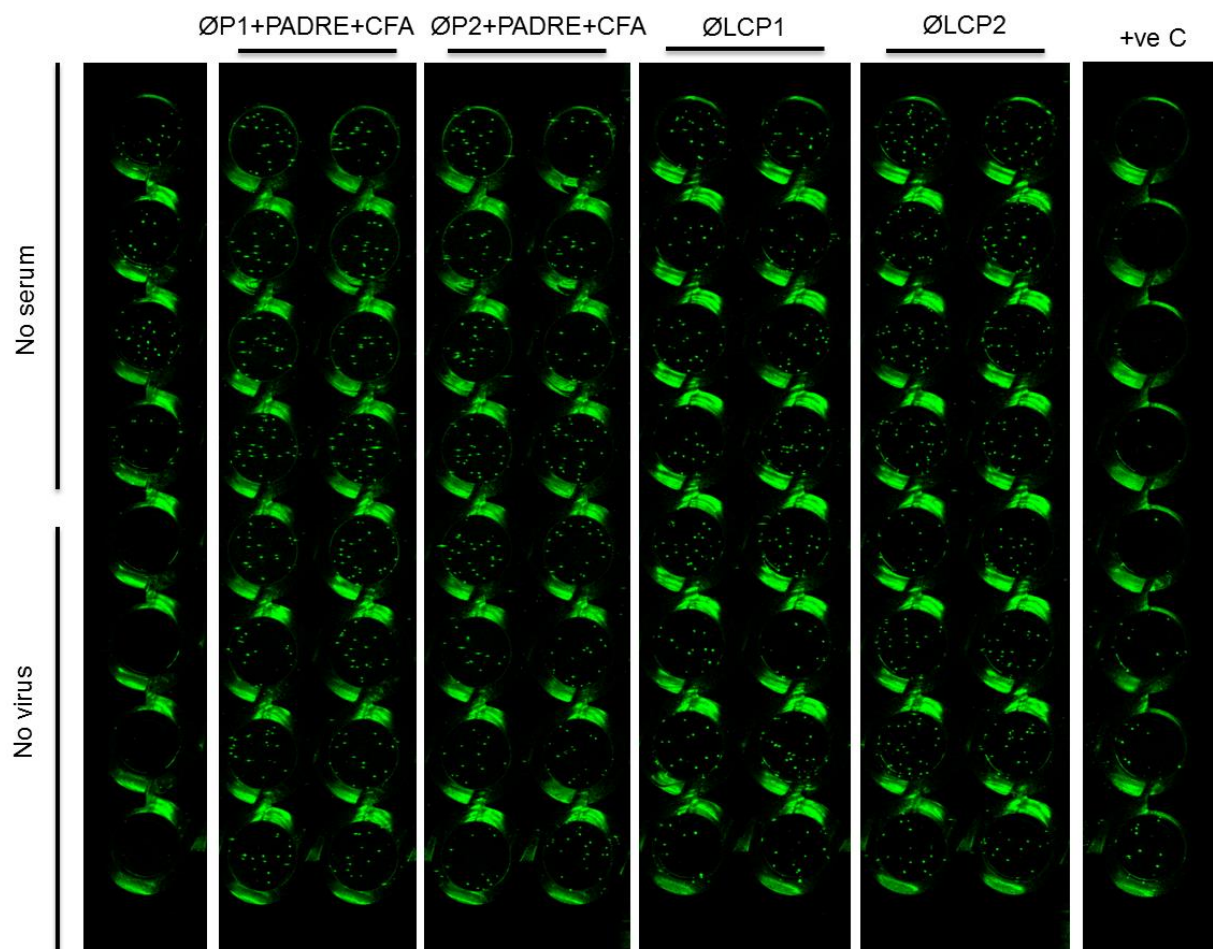

**Figure S18** Plaque reduction neutralisation test. Vero cells were incubated with the serum-virus mixture. No neutralisation was observed. Positive control (+ve C) is serial dilution of Motavizumab.
